# Supplementary material for: Hospital discharge communications during care transitions for patients with acute kidney injury: a cross-sectional study
Source: Springer Nature journal article supplement (doi:10.1186/s12913-016-1697-7), 2016-08-30
Supplement: MOESM1 [file 10632686]

Additional file 1: Medical Record Review Components

|                                                                                                                                                                                                                                                                                                                                                                                                                                                                                                                                         |
|-----------------------------------------------------------------------------------------------------------------------------------------------------------------------------------------------------------------------------------------------------------------------------------------------------------------------------------------------------------------------------------------------------------------------------------------------------------------------------------------------------------------------------------------|
| <b>Discharge Summary</b>                                                                                                                                                                                                                                                                                                                                                                                                                                                                                                                |
| <p><b>Patient Demographics</b></p> <ul style="list-style-type: none"> <li>Patient age on admission</li> <li>Gender</li> <li>Race/ethnicity</li> </ul>                                                                                                                                                                                                                                                                                                                                                                                   |
| <p><b>Clinical Characteristics</b></p> <ul style="list-style-type: none"> <li>AKI risk factors (e.g., chronic kidney disease, diabetes, hypertension, coronary artery disease, congestive heart failure)</li> <li>Other medical conditions (e.g., stroke, malignancy, liver disease)</li> </ul>                                                                                                                                                                                                                                         |
| <p><b>Hospital Course</b></p> <ul style="list-style-type: none"> <li>Length of stay (days)</li> <li>Admitting and discharge service</li> <li>Transfers during hospitalization (count)</li> <li>Intensive care unit stay during hospitalization</li> <li>Primary admitting diagnosis</li> <li>Discharge medications</li> <li>Dialysis requirement (i.e., hospitalization/discharge)</li> <li>Patient Disposition (e.g., home, skilled nursing facility, etc)</li> <li>Readmission within 30 days</li> </ul>                              |
| <p><b>AKI Documentation</b></p> <ul style="list-style-type: none"> <li>Terminology Used to Document AKI (i.e., kidney/renal injury, kidney/renal insufficiency, kidney/renal failure, creatinine increase/rise/bump, eGFR decline/decrease, prerenal, decreased/low urine output, or other)</li> <li>Cause of AKI (e.g., Contrast media administration, medication-related, sepsis, volume contraction, overdiuresis, cardiogenic shock, etc.)</li> <li>Course of AKI (i.e., nadir/baseline, peak, and discharge creatinine)</li> </ul> |
| <p><b>Follow-up Care</b></p> <ul style="list-style-type: none"> <li>Appointment(s) (i.e., timing and provider type)</li> <li>AKI related laboratory tests (i.e., BMP, creatinine, or potassium)</li> <li>Physician listed to receive discharge summary</li> </ul>                                                                                                                                                                                                                                                                       |
| <b>Patient Discharge Worksheet</b>                                                                                                                                                                                                                                                                                                                                                                                                                                                                                                      |
| <p><b>AKI Documentation</b></p> <ul style="list-style-type: none"> <li>Terminology Used to Document AKI</li> <li>Cause of AKI</li> </ul>                                                                                                                                                                                                                                                                                                                                                                                                |
| <p><b>Follow-up Care</b></p> <ul style="list-style-type: none"> <li>Follow-up Appointment (i.e. timing and provider type)</li> <li>Follow-up laboratory tests related to AKI</li> <li>Patient education about AKI (e.g., avoid NSIADS, medication adjustment/discontinuation, hydration, other)</li> </ul>                                                                                                                                                                                                                              |
